# Supplementary material for: A study of negative-thermal-quenching (Ba/Ca)AlSi5O2N7:Eu2+ phosphors
Source: Royal Society of Chemistry journal article supplement (doi:10.1039/d1dt02752b), 2021-01-01
Supplement: d1dt02752b1.pdf [file d1dt02752b1.pdf]

## Supplementary Information

### A study of negative-thermal-quenching

#### (Ba/Ca)AlSi<sub>5</sub>O<sub>2</sub>N<sub>7</sub>:Eu<sup>2+</sup> phosphors

Hongping Ma,<sup>\*a</sup> Shixu Tao,<sup>a</sup> Youjie Hua,<sup>b</sup> Jun Zheng,<sup>a</sup> Luyi Lou,<sup>a</sup> Yiheng Ping<sup>a</sup> and Peng Qiao<sup>c</sup>

#### Supplementary Figures:

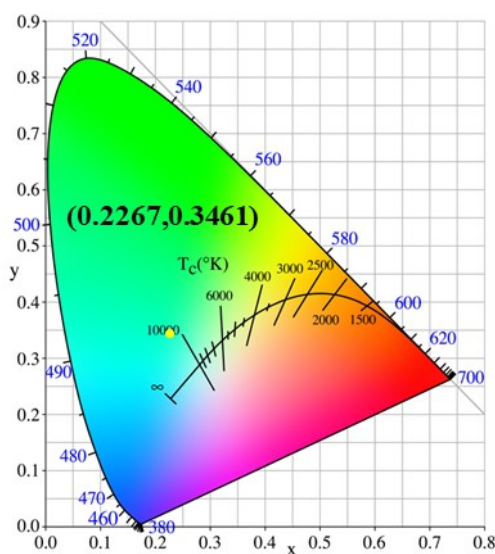

Figure. S1 CIE color coordinates of Ba<sub>0.68</sub>Ca<sub>0.3</sub>AlSi<sub>5</sub>O<sub>2</sub>N<sub>7</sub>:0.02Eu<sup>2+</sup> PL spectrum.

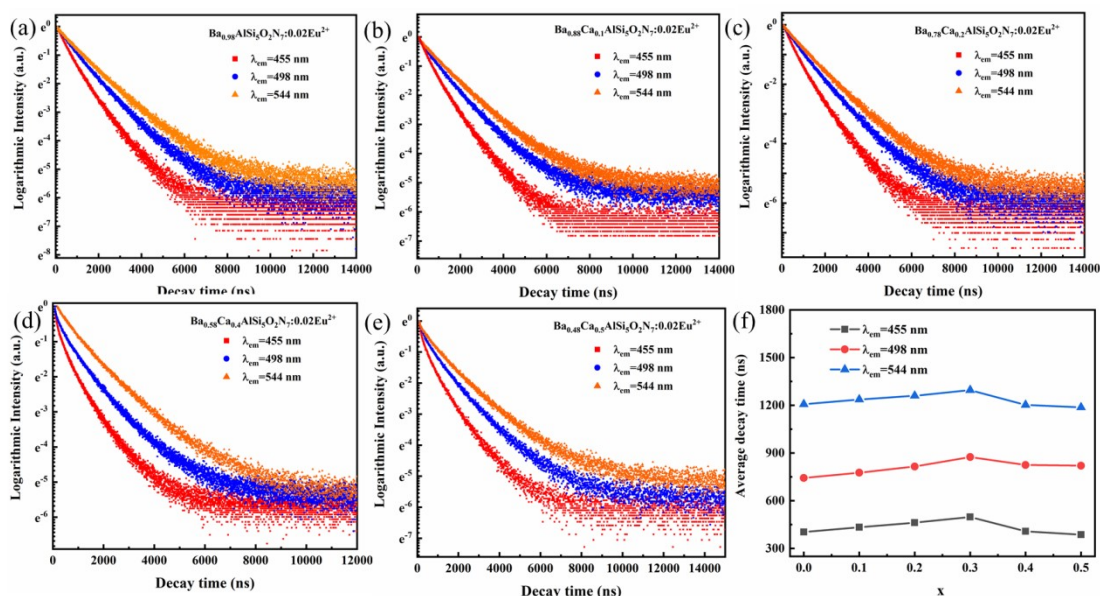

Figure. S2 (a)-(e) Decay curves of Ba<sub>0.98-x</sub>Ca<sub>x</sub>AlSi<sub>5</sub>O<sub>2</sub>N<sub>7</sub>:0.02Eu<sup>2+</sup> at different emission wavelength, (f) average decay times of phosphors with different Ca<sup>2+</sup>.

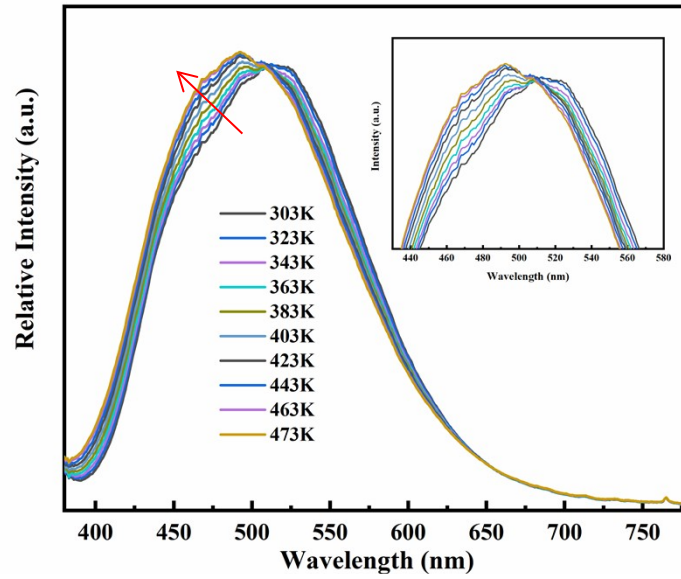

Figure. S3 PL spectra of  $\text{Ba}_{0.68}\text{Ca}_{0.3}\text{AlSi}_5\text{O}_2\text{N}_7:0.02\text{Eu}^{2+}$  at 303-473K, the inset shows the enlarged PL spectra from 430nm-570nm.

### Supplementary Table:

**Table S1:** Refinement parameter of  $\text{Ba}_{1-x}\text{Ca}_x\text{AlSi}_2\text{O}_5\text{N}_7:\text{Eu}^{2+}$  phosphor.

| $x$ | $a$ (Å) | $b$ (Å) | $c$ (Å) | $R_{\text{wp}}$ (%) | $R_{\text{p}}$ (%) |
|-----|---------|---------|---------|---------------------|--------------------|
| 0   | 8.2223  | 9.65576 | 4.89786 | 12.75               | 16.52              |
| 0.1 | 8.23083 | 9.68571 | 4.90837 | 9.53                | 13.02              |
| 0.2 | 8.22317 | 9.6931  | 4.90359 | 9.89                | 13.32              |
| 0.3 | 8.23782 | 9.68018 | 4.91329 | 9.69                | 12.6               |
| 0.4 | 8.28833 | 9.67038 | 4.93879 | 16.28               | 22.38              |
| 0.5 | 8.25523 | 9.61749 | 4.91808 | 17.17               | 22.95              |
